# Supplementary material for: IgE epitope analysis of sarcoplasmic-calcium-binding protein, a heat-resistant allergen in Crassostrea angulata
Source: Royal Society of Chemistry journal article supplement (doi:10.1039/d1fo01058a), 2021-01-01

**1 Supporting information**

**2 Figure legends**

**3 Figure S1. The biopanning process of *Cra a 4* mimotopes by phage display technology**

4 (A) Titration of the eluted and amplified phages.

5 (B) Agarose gel electrophoresis of phage DNA. Lane M: DNA marker; Lane 1-20, DNA phages.

6 Table S1. Location of the allergenic epitopes of *Cra a 4* predicted by immunoinformatic tools.

---

| Tools                | Amino acid regions                                            |
|----------------------|---------------------------------------------------------------|
| ABCpred              | 7-91, 93-178                                                  |
| BepiPred 1.0 Server  | 22-33, 44-48, 66-72, 81-85, 107-115, 144-147                  |
| NetMHC II 2.3 Server | 58-73                                                         |
| Immunomedicine Group | 11-17, 37-43, 72-81, 84-90, 93-104, 115-124, 129-139, 144-159 |
| DNASStar Protean     | 19-36, 64-75, 80-87, 106-116, 141-145, 161-169                |

---

7

8

9 Figure S1

A

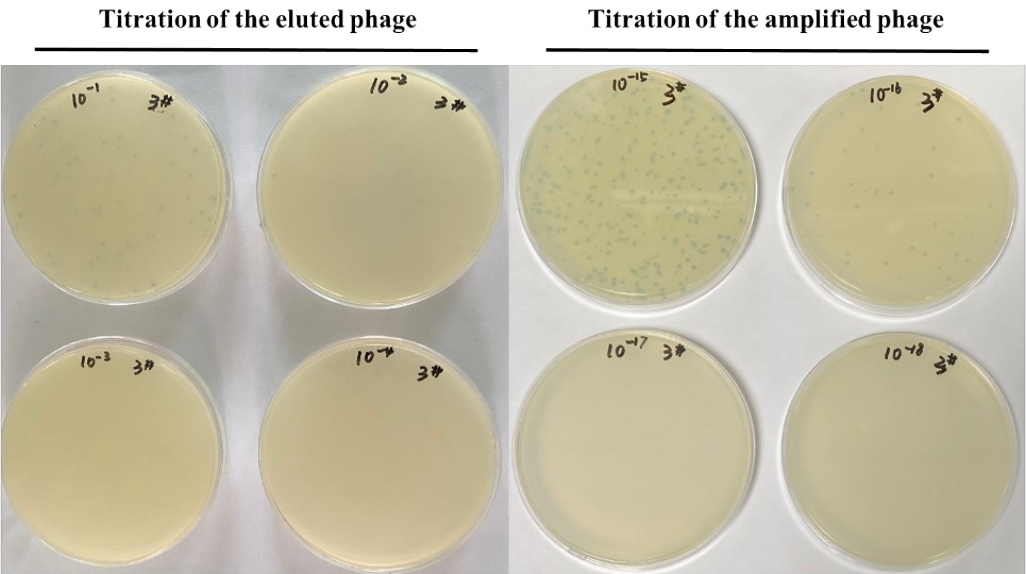

B

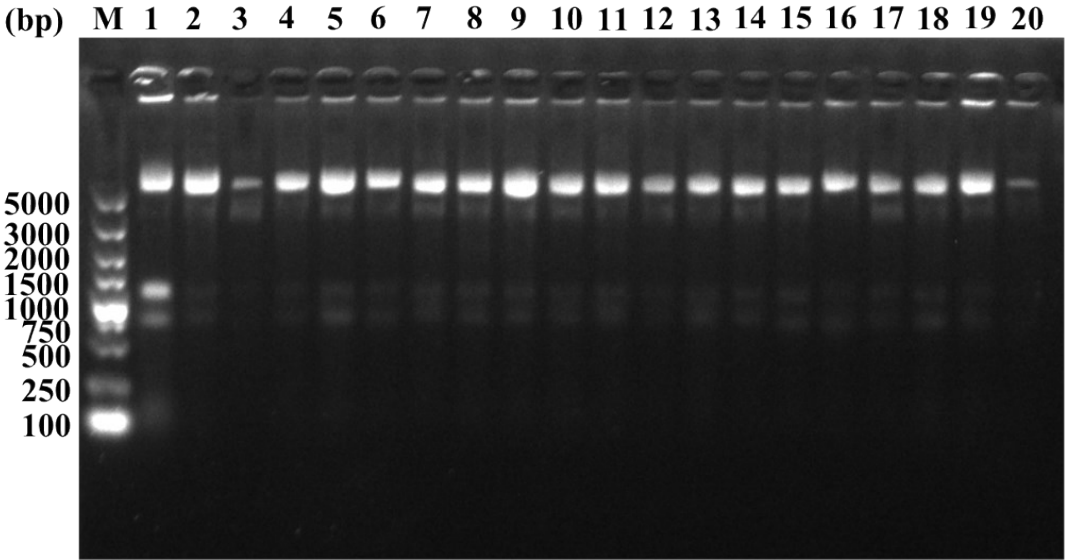

Supplement: d1fo01058a1.pdf [file d1fo01058a1.pdf]
